1 **Whole-brain fluorescence-MRI coregistration for precise anatomical mapping**  
2 **of virus infection**

3  
4  
5 Nunya Chotiwan<sup>1,2\*</sup>, Stefanie M. A. Willekens<sup>1,2,3</sup>, Erin Schexnaydre<sup>2,4,5</sup>, Max Hahn<sup>3</sup>, Federico  
6 Morini<sup>3</sup>, Jianguo Zhang<sup>2,4,5,†</sup>, Emma Nilsson<sup>1,2</sup>, Lars-Anders Carlson<sup>2,4,5</sup>, Ulf Ahlgren<sup>3</sup>, Daniel  
7 Marcellino<sup>6</sup>, Anna K. Överby<sup>1,2\*</sup>  
8

9 **Affiliations:**

10 <sup>1</sup>Department of Clinical Microbiology, Umeå University; Umeå, Sweden.

11 <sup>2</sup>The laboratory for Molecular Infection Medicine Sweden (MIMS), Umeå University; Umeå,  
12 Sweden.

13 <sup>3</sup>Umeå Centre for Molecular Medicine (UCMM), Umeå University; Umeå, Sweden.

14 <sup>4</sup>Wallenberg Centre for Molecular Medicine, Umeå University; Umeå, Sweden.

15 <sup>5</sup>Department of Medical Biochemistry and Biophysics, Umeå University; Umeå, Sweden.

16 <sup>6</sup>Department of Integrative Medical Biology, Umeå University; Umeå, Sweden.

17 †Current address: Center for Biological Imaging, Institute of Biophysics, Chinese Academy of  
18 Sciences; Beijing, China

19

20 \*Corresponding authors. E-mail: [nunya.chotiwan@umu.se](mailto:nunya.chotiwan@umu.se), [anna.overby@umu.se](mailto:anna.overby@umu.se)

21

22

23

24 **Abstract:**

25 Neurotropic virus infections cause tremendous disease burden. Methods visualizing infection in  
26 the whole brain remain unavailable which greatly impedes understanding of viral neurotropism  
27 and pathogenesis. We devised an approach to visualize the distribution of neurotropic virus  
28 infection in whole mouse brain *ex vivo*. Optical projection tomography (OPT) signal was  
29 coregistered with a unique magnetic resonance imaging (MRI) brain template, enabling precise  
30 anatomical mapping of viral distribution, and the effect of type I interferon on distribution of  
31 infection was analyzed. Guided by OPT-MR, we show that Langat virus specifically targets  
32 sensory brain systems and the lack of type I interferon response results in an anatomical shift in  
33 infection patterns in the brain. We confirm this regional tropism, observed with whole brain OPT-  
34 MRI, by confocal and electron microscopy to provide unprecedented insight into viral  
35 neurotropism. This approach can be applied to any fluorescently labeled target in the brain.

36

37

38

39

40

41

42

43

44

45 **Introduction:**

46 Virus species from multiple virus families are neuroinvasive and neurotropic <sup>1,2</sup>. These viruses  
47 not only cross the physical brain barriers, but also infect the central nervous system, potentially  
48 leading to lethal encephalitis or long-term neurological sequelae among survivors <sup>3-5</sup>. While global  
49 disease burden remains high, better understanding of viral pathogenesis is required for the  
50 development of effective diagnosis, therapy, and prevention measures <sup>6,7</sup>. One of the major  
51 obstacles for studying viral pathogenesis within the entire brain is the lack of feasible imaging  
52 approaches to visualize virus infection at cellular to subcellular levels, while still providing a  
53 global view within a preserved anatomical tissue context.

54 While confocal microscopy provides invaluable information at the subcellular level, any three-  
55 dimensional (3D) information provided by the approach is limited to the  $\mu\text{m}$ – $\text{mm}$  range. Since  
56 neurons consist of cell bodies with long axons that can project to distant brain areas, it is extremely  
57 challenging to obtain an overall view of viral distribution within the context of the entire brain  
58 based solely on tissue section analyses. Mesoscopic techniques such as optical projection  
59 tomography (OPT) and light sheet fluorescence microscopy (LSFM) are 3D imaging techniques  
60 for transparent mesoscopic sized (mm- a few cm) tissue samples; and therefore, are suitable for  
61 whole rodent brain imaging. These methods can provide information at cellular resolution while  
62 still capturing the entire tissue in 3D and have been used in various applications for targeted  
63 imaging, such as, whole organ distribution of specific protein expression via immunolabeling <sup>8-10</sup>.  
64 However, anatomical information obtained from OPT, based on tissue autofluorescence, is limited.  
65 Magnetic resonance imaging (MRI), conversely, is widely used for anatomical brain imaging since  
66 it has exquisite contrast and resolution <sup>11</sup>. In its turn, structural MRI is not suitable for imaging  
67 pathogens.

68 For a holistic view of viral brain infection, here, we devised an imaging approach that, for the first  
69 time, provides spatial distribution of virus infection in the brain, with precise anatomical mapping.  
70 Specifically, we generated an MRI template for *ex vivo* optically cleared adult mouse brains and  
71 coregistered it with whole brain viral signal acquired from 3D OPT images (~0.5 cm<sup>3</sup>). We used  
72 this approach to evaluate, the detailed distribution of Langkat virus (LGTV), a model neurotropic  
73 flavivirus, in wild type (WT) mice and mice lacking type I interferon (IFN) response, *Ifnar*<sup>-/-</sup>. Type  
74 I IFN response is the first line of antiviral defense in the brain and can, therefore, influence viral  
75 distribution<sup>12</sup>. In conjunction with confocal and electron microscopy, which confirmed the  
76 presence of virus infection in the identified areas, we can also identify the cellular tropism of virus  
77 infection in the brain. The developed MRI template and MRI-OPT coregistration approach enable  
78 precise anatomical mapping of any signal obtained from *ex vivo* optical brain images. It is an  
79 invaluable tool to study whole brain viral distribution with precise anatomical context and is  
80 applicable for any pathogen.

81

## 82 **Results:**

### 83 ***Whole brain 3D imaging of virus infection***

84 Previous studies have confirmed LGTV infection in rodent brains using immunohistochemistry or  
85 quantitative PCR<sup>13-15</sup>. However, the complete overview of viral distribution throughout the whole  
86 brain is still unknown. Therefore, we first established an approach for imaging virus infection in  
87 the whole brain and tested its biological value using WT and *Ifnar*<sup>-/-</sup> mice. We infected the mice  
88 with LGTV, immunolabeled the brains against LGTV nonstructural protein 5 (NS5), optically  
89 cleared and scanned the brains with OPT. This novel approach allowed visualization of virus

90 infection throughout the whole brain. We observed that *Ifnar*<sup>-/-</sup> mice were more susceptible for  
91 infection (Supplementary Fig. 1) and that viral distribution in these mice was strikingly different  
92 when compared to WT mice (Fig. 1a, Supplementary Fig. 2, Supplementary Movie 1). In *Ifnar*<sup>-/-</sup>  
93 brains, we observed pronounced infection, spanning from the interior wall of the lateral ventricles  
94 to the anterior cerebrum and olfactory bulbs, resembling the rostral migratory stream, in addition  
95 to third ventricle and fourth ventricle choroid plexus (ChP). To complement OPT data, we used  
96 LSFM to visualize fourth ventricle ChP infection at high resolution (Supplementary Movie 2). We  
97 also observed weak infection in the cerebral cortex compared to other areas. By contrast, in WT  
98 mice, infection was mainly localized in cerebral cortex, with no detectable infection in rostral  
99 migratory stream, lateral ventricle, and fourth ventricle (Fig. 1a, Supplementary Fig. 2, and  
100 Supplementary Movie 1). Of note, we also detected some low-level unspecific signal in uninfected  
101 brains (mock group) (Fig. 1a and Supplementary Fig. 2), most likely due to ventricular antibody  
102 trapping or unspecific antibody absorption in meninges during whole brain immunolabeling.

103 In theory, OPT or LSFM imaging allows for the study of any immunolabeled pathogen or protein  
104 of choice. However, it greatly depends on the availability of specific antibodies that can withstand  
105 harsh chemical treatment and their ability to penetrate the brain. Detection of an endogenously  
106 expressed fluorescent protein could bypass the need for these specific antibodies. Several GFP-  
107 expressing pathogens already exist; however, several fluorescent proteins, especially green  
108 fluorescent protein (GFP), are severely quenched during the clearing process<sup>10</sup>. Therefore, we  
109 investigated whether an anti-GFP antibody could be used as a general OPT probe. Accordingly,  
110 we infected *Ifnar*<sup>-/-</sup> mice with GFP-expressing LGTV (LGTV-GFP) and immunolabeled the brain  
111 *ex vivo* with anti-NS5 and anti-GFP antibodies. We observed a clear overlap between OPT signals  
112 from viral NS5 and GFP-expressing virus, indicating the possibility to visualize any GFP-

113 expressing pathogen in the brain using OPT without the need of specific antigens (Fig. 1b,  
114 Supplementary Movie 3). Taken together, we were able to visualize viral infection and viral  
115 distribution in the whole brain using 3D imaging. Furthermore, our 3D OPT approach can be  
116 translated to study whole brain distribution of any GFP- labeled pathogen.

117

### 118 ***OPT-MRI coregistration for anatomical mapping of virus infection***

119 We have now shown that OPT allows visualization of viral brain infection with great sensitivity  
120 and high spatial resolution. However, the anatomical information obtained from tissue  
121 autofluorescence is insufficient to provide a detailed anatomical reference frame for the multitude  
122 of structures the brain can be divided in <sup>16</sup> and which are involved in different physiological  
123 functions. Therefore, we are in need of an improved anatomical reference frame, allowing precise  
124 identification of the infected brain areas.

125 To address this, we coregistered our viral OPT images with structural MR images. Because our  
126 OPT images are acquired *ex vivo* after extensive chemical tissue processing, we acquired *ex vivo*  
127 MR images after chemical preprocessing and OPT acquisition (Fig. 2a). We then coregistered  
128 these MR images with viral OPT signal, which resulted in fusion images with good spatial  
129 alignment (Fig. 2b). To obtain an anatomical reference with improved anatomical detail and tissue  
130 contrast and to overcome high MR-scanning costs of individual brains in the future, we created a  
131 high-resolution *ex vivo* MRI brain template, acquired after tissue bleaching and clearing for optical  
132 imaging. We designed a novel study- and sequence specific brain template by serial longitudinal  
133 registration of ten optically cleared brains and generated corresponding tissue probability maps  
134 (TPMs) (Fig. 2 c-e), required for image segmentation and image normalization (warping) to the

135 template, as described in the Materials and methods. Afterwards, we created a study-specific  
136 animal preset in the toolbox SPMMouse (<http://spmmouse.org>)<sup>17</sup>, which resulted in improved  
137 warping and normalization of viral OPT signal to the template. Finally, we normalized individual  
138 differences in tissue deformation to compensate for natural variation in brain size, which allowed  
139 for improved coregistration of viral signal, mainly in the olfactory bulbs. In optimized OPT-MRI  
140 template fusion images, the viral signal was displayed within a detailed anatomical context  
141 provided by MRI (Fig. 2d,f), allowing for precise identification of infected brain regions.

### 142 ***Highly accurate brain map of viral infection***

143 The OPT images displaying viral signal in the whole brain together with the study-specific brain  
144 template, provide a detailed anatomical reference frame after coregistration. This allowed us to  
145 proceed to our ultimate goal, namely, to evaluate the differential viral distribution patterns in WT  
146 and *Ifnar*<sup>-/-</sup> mice (Fig. 3). The high-resolution viral signal displayed within the detailed anatomy,  
147 afforded by OPT-MRI coregistration offered unprecedented detail and insights into viral brain  
148 distribution. In *Ifnar*<sup>-/-</sup> mice, we detected specific infection in grey matter (GM), white matter  
149 (WM), and the ventricular system (Fig. 3a-c, left panels). For GM, we observed viral signal in the  
150 granular cell layer of the olfactory bulb, entorhinal cortex, dorsal endopiriform nucleus, piriform  
151 area, agranular insula, primary visual field, and primary somatosensory cortex (upper limb and  
152 barrel field). In WM, we detected viral signal in the olfactory limb of the anterior commissure,  
153 anterior forceps of corpus callosum, and supra-callosal WM. The identified regions are part of  
154 distinct sensory systems, such as the olfactory system, visual system, and somatosensory system.  
155 We also observed viral signal in ChP and the interior wall of lateral ventricles, third ventricle, and  
156 fourth ventricle. Of note, ChP of the lateral ventricle, subventricular zone, and the olfactory limb  
157 of the anterior commissure are all parts of the rostral migratory stream, suggesting specific

158 infection of the ventriculo–olfactory neurogenic system by LGTV. In WT mice, however, the viral  
159 signal was limited to entorhinal cortex, piriform area, primary visual field and the third ventricle  
160 (Fig. 3a-c, right panels), suggesting a major influence of the type I IFN response on virus  
161 infectivity and distribution in the mouse brain.

### 162 ***Validation of OPT-MRI viral signals by confocal and electron microscopy***

163 Guided by OPT-MRI fusion images, we confirmed LGTV infection in the brain regions identified  
164 as infected in whole brain imaging on sections using confocal and electron microscopy. Apart from  
165 confirming the presence of viral infection in these areas, it also allowed us to investigate viral  
166 cellular tropism, leading to new biological insights. In rostral migratory stream, we observed viral  
167 infection in immature neurons in both mouse models (Fig. 4a). However, we only observed viral  
168 infection in leptomeninges, endothelial cells lining the blood vessels in the subarachnoid space,  
169 ChP epithelial cells and ependymal cells lining the ventricular wall in *Ifnar*<sup>-/-</sup> but not WT brains  
170 (Fig. 4b-c and Supplementary Fig. 3a,b). This result confirms that the signal observed from these  
171 areas in the OPT images of LGTV infected and mock WT brains was due to non-specific antibody  
172 absorption (Fig. 1a and Supplementary Fig. 2). To further confirm the presence of virus, we imaged  
173 fourth ventricle ChP of *Ifnar*<sup>-/-</sup> brain, identified as highly infected on OPT-MRI, using electron  
174 microscopy. Transmission electron microscopy (TEM) imaging of ChP epithelial cells, marked by  
175 the presence of cilia, revealed extreme distortion of endoplasmic reticulum (ER) membranes in the  
176 infected compared to mock tissue (Fig. 4d and Supplementary Fig. S3c,d). High-magnification  
177 analysis revealed virus particles in the ER lumen (Fig. 4d, inset a) and the formation of viral  
178 replication complexes, as bud-like invaginations of the ER membrane (Fig. 4d, inset ii).  
179 Segmentation of volume images taken by focused ion beam milling-scanning electron microscopy  
180 (FIB-SEM) showed the 3D architecture of replication complexes within ER of infected cells (Fig.



181 4e-f, Supplementary Fig. 3e and Supplementary Movie 4). Lastly, we investigated infection in  
182 cerebral cortex, focusing on the piriform area and entorhinal cortex. In both mouse models, we did  
183 not observe infection in astrocytes (Supplementary Fig. 3f). However, we observed infection in  
184 mature neurons in WT brain, while microglia remained uninfected (Fig. 4g). Surprisingly, we  
185 observed the opposite cellular tropism in *Ifnar*<sup>-/-</sup> brains, namely infected microglia and refractory  
186 neurons, (Fig. 4g), indicating that the type I IFN response shapes cellular tropism of viral infection  
187 in the brain. Taken together, our OPT-MR fusion technique allowed us to specifically identify  
188 infected regions, which could then be used to further investigate viral behavior in more detail,  
189 leading to the discovery of this remarkable tropism shift under influence of the type 1 IFN  
190 response.

191

## 192 **Discussion:**

193 Imaging techniques provide pivotal information on biological processes in cells and tissues. Each  
194 technique has its own advantages and limitations, such as spatial resolution and specimen size,  
195 which makes it challenging to observe detailed biological phenomena while maintaining an  
196 overview of the whole organ and its anatomical reference frame. Here, we report a whole brain  
197 imaging approach, which allows visualization of fluorescent targeted signals from OPT and precise  
198 anatomical brain mapping when applied in combination with our developed MR template for  
199 optically cleared brains. This allowed subsequent targeting of brain regions for higher-resolution  
200 imaging using confocal and 3D electron microscopy. The novel approach can be utilized as a tool  
201 to improve our understanding of viral pathogenesis or, in fact, of any immunolabeled target, in the  
202 whole mouse brain.

203 Considering the mesoscopic sample size (mm-cm) and the reasonable scan times (~ 90 min per  
204 brain) to obtain high-resolution (13.2  $\mu\text{m}$  for our setting), OPT seems ideally suited to visualize  
205 viral distribution in the whole mouse brain. However, since OPT systems are not commercially  
206 available, LSFM is often applied. Our approach could also be applied to LSFM to visualize viral  
207 distribution in the whole brain with even higher resolutions as compared to OPT but with  
208 consequent elongated scanning times. One should also keep in mind that, in contrast to OPT and  
209 MRI, LSFM results in images with non-isotropic voxels, leading to slight mismatch alignment of  
210 LSFM-MR fusion images.

211 To date, various mouse brain templates that can be used as an anatomical reference are available.  
212 However, they are either based on histology<sup>16,18</sup> or, *in vivo* or *ex vivo in situ* MRI<sup>19-21</sup>. However,  
213 OPT images are acquired *ex vivo* after bleaching and optical clearing. These chemical treatments  
214 result in a certain level of tissue alteration, which lead to misalignment when coregistering brain  
215 OPT signals to these existing templates. Therefore, we designed a study-specific brain template  
216 consisting of *ex vivo* MR scans, acquired after OPT pre-processing, and coregistered it with viral  
217 OPT signal, which yielded exact alignment and allowed precise identification of infected brain  
218 regions. It should be noted here, however, that the template is based on brains that underwent  
219 particular chemical permeabilization and bleaching and, that were cleared with BABB (see  
220 Materials and methods). The application of distinct pre-processing and clearing protocols, such as  
221 iDisco<sup>22</sup>, may affect the brain differently and lead to divergent brain deformations.

222 In this study, we also showed that OPT-MRI coregistration set the base for novel insights in  
223 infection biology. The fusion images revealed distinct infection patterns driven by type I IFN  
224 response. In *Ifnar*<sup>-/-</sup> mice, infection mainly localized in regions belonging to the visual,  
225 somatosensory, and, most extensively, olfactory system, while in WT infection was mainly

226 restricted to regions processing olfactory information, which have been previously reported for  
227 other flaviviruses<sup>23,24</sup>. The susceptibility of the olfactory system to LGTV infection in both WT  
228 and *Ifnar*<sup>-/-</sup> brains implies that the type I IFN response is, in itself, not sufficient to protect this  
229 neuronal circuit from viral infection. In contrast, the susceptibility of the ChP and leptomeninges,  
230 which were only permissive to viral infection in *Ifnar*<sup>-/-</sup> brains, indicates that the antiviral  
231 properties of these tissues greatly depend on type I IFN response. Lastly, while infection in *Ifnar*<sup>-</sup>  
232 <sup>-</sup> brains could be found in both WM and GM, infection in WT brains was restricted to the latter.  
233 This restriction might, at least in part, relate to the surprising cellular tropism shift from mature  
234 neurons in WT to microglia in *Ifnar*<sup>-/-</sup> brains (Fig. 4g). In WT, the virus infected the cell body of  
235 mature neurons, residing in GM, while in *Ifnar*<sup>-/-</sup>, the virus infected microglia, which reside both  
236 in GM and WM. To the best of our knowledge, such striking cellular tropism shift has not been  
237 reported to date *in vitro* or *in vivo*.

238 Collectively, we demonstrate that OPT-MRI fusion images enable precise whole brain mapping  
239 of viral 3D fluorescence signal and, that the creation of such images opens the door to novel  
240 insights in infection biology. Since the approach is not only applicable to image viral infection but  
241 can be translated to any fluorescently labeled target in the brain, visualized by OPT or LSM, it  
242 holds the power to improve our knowledge and understanding of any neurological condition with  
243 anatomical precision.

244

## 245 **Materials and Methods:**

### 246 *Animals*

247 C57BL/6 WT mice and interferon alpha receptor knockout (*Ifnar*<sup>-/-</sup>) mice in C57BL/6 background  
248 were kindly provided by N.O. Gekara (Department of Molecular Biology, Umeå University;

249 current address: Department of Molecular Biosciences, The Wenner-Gren Institute, Stockholm  
250 University, Sweden)<sup>12</sup>. Mice were bred as homozygotes and maintained under specific pathogen-  
251 free conditions. All animal experiments were conducted at the Umeå Centre for Comparative  
252 Biology (UCCB). All animal experiments were approved by the regional Animal Research Ethics  
253 Committee of Northern Norrland and by the Swedish Board of Agriculture (ethical permits: A9-  
254 2018 and A41-2019), and all procedures were performed according to their guidelines.

255

### 256 *Viruses*

257 LGTV strain TP21 was a kind gift from G. Dobler (Bundeswehr Institute of Microbiology,  
258 Munich, Germany) and GFP-expressing LGTV (LGTV-GFP) infectious clone was a kind gift from  
259 A. Pletnev (NIAID, NIH)<sup>25</sup>. LGTV stock was produced in VeroB4 cells, a kind gift from G.  
260 Dobler,<sup>26</sup> and harvested on day 3 post infection when cytopathic effect was apparent. A 1:1  
261 mixture of VeroB4 and HEK 293T cells, a kind gift from F. Weber (Biomedical Research Center  
262 Seltersberg (BFS), Justus Liebig University Giessen, Germany) was transfected with the LGTV-  
263 GFP plasmid using GeneJuice® Transfection Reagent (#70967, Sigma Aldrich, USA), following  
264 manufacturer's protocol. Virus supernatant was harvested on day 7 post infection. Both virus  
265 stocks were titrated on VeroB4 cells using focus-forming assay<sup>26</sup>.

266

### 267 *Virus infection in mouse model*

268 For the experiments, the animals (7- to 11-week-old, mixed gender) were randomly divided into  
269 the following groups: WT, mock-infected; WT, LGTV-infected; *Ifnar*<sup>-/-</sup>, LGTV-infected. After  
270 sedation with ketamine (100 µg/g body weight) and xylazine (5 µg/g body weight), the animals  
271 were intracranially inoculated with 1000 pfu of LGTV or with 10,000 pfu of LGTV-GFP

272 suspended in 20  $\mu$ L of PBS. Infected mice were euthanized using O<sub>2</sub> deprivation when they  
273 developed any one severe symptom, such as: >20% weight loss, bilateral eye infection, diarrhea,  
274 or hind-limb paralysis; or when they developed three milder symptoms, such as: >15% weight  
275 loss, unilateral eye infection, facial edema, ruffled fur, or overt bradykinesia, and/or development  
276 of stereotypies. Following euthanasia, cardiac perfusion was performed using 20 mL of PBS,  
277 followed by 20 mL of 4% w/v paraformaldehyde (PFA) in PBS, after which the perfused brain  
278 was removed for *ex vivo* analysis.

279

### 280 ***Whole-mount immunohistochemistry (IHC) and OPT***

281 PFA-fixed brain was fluorescently immunolabeled with an antibody against viral NS5  
282 (Supplementary Table 1) and processed for OPT imaging, as previously described<sup>27,28</sup>. Briefly,  
283 the brain was dehydrated in a stepwise gradient of methanol (MeOH), permeabilized by repeated  
284 freeze–thawing in MeOH at –80 °C and a bleaching solution (MeOH:H<sub>2</sub>O<sub>2</sub>:DMSO at 2:3:1) to  
285 quench tissue autofluorescence. For immunolabeling, specimens were rehydrated in TBST (50  
286 mM Tris-HCl, pH 7.4, 150 mM NaCl, and 0.1% v/v TritonX-100), blocked with 10% v/v normal  
287 goat serum (NGS) (#CL1200-100, Nordic Biosite, Sweden), 5% v/v DMSO, and 0.01% w/v  
288 sodium azide in TBST at 37 °C for 48 h, and labeled with primary (chicken anti-NS5 and/or rabbit  
289 anti-GFP, Supplementary Table 1) and secondary (goat anti-chicken Alexa Fluor 680 and/or  
290 donkey anti-rabbit Alexa Fluor 594, Supplementary Table 1) antibodies diluted in blocking buffer.  
291 They were incubated at 37 °C for 4 d at each staining step. The stained tissue was mounted in 1.5%  
292 w/v low melting point SeaPlaque™ agarose (#50101, Lonza, Switzerland) and optically cleared  
293 using a BABB solution (benzyl alcohol (#1.09626.1000, Supelco, USA) : benzyl benzoate  
294 (#10654752, Thermo Fisher Scientific, USA) at 1:2).

295 OPT imaging was performed with an in-house developed near-infrared OPT (NIR-OPT) system  
296 described in detail in Eriksson et al.<sup>28</sup>, with a zoom factor of 1.6 or 2.0, that resulted in an isotropic  
297 voxel dimension of 16.5  $\mu\text{m}^3$  and 13.2  $\mu\text{m}^3$ , respectively. To obtain specific fluorescent viral (NS5)  
298 signal coupled with Alexa Fluor 680, anti-GFP antibody coupled with Alexa Fluor 594, and tissue  
299 autofluorescence signals, OPT images were acquired at the following filter settings: Ex: 665/45  
300 nm, Em: 725/50 nm (exposure time: 7000 ms); Ex: HQ565/30, Em: 620/60 (exposure time: 5000  
301 ms); and Ex: 425/60 nm, Em: 480 nm (exposure time: 500 ms), respectively.

302 To increase the signal-to-noise ratio for NS5, the pixel intensity range of all images was adjusted  
303 to display the minimum and maximum, and a contrast-limited adaptive histogram equalization  
304 (CLAHE) algorithm with a tile size of  $64 \times 64$  was applied to projection images acquired in the  
305 NS5 channel<sup>29</sup>. Tomographic reconstruction was performed using NRecon software (v.1.7.0.4,  
306 Skyscan microCT, Bruker, Belgium) with additional misalignment compensation and ring artifact  
307 reduction. Image files were converted to Imaris files (.ims) using the Imaris file converter (v9.5.1,  
308 Bitplane, UK). NS5 signal from all imaged brains was adjusted to display at min = 0, max = 200,  
309 and gamma = 1.2, and colored using red glow color scheme. The signal was superimposed onto  
310 the corresponding tissue autofluorescence image using 3D iso-surface rendering in Imaris software  
311 (v9.5.1, Bitplane).

312

### 313 *Light sheet fluorescent imaging*

314 High-resolution images of ChP in the fourth ventricle of individual *Ifnar*<sup>-/-</sup> brains, previously  
315 scanned using OPT, were acquired by LSFM. To compensate for any phototoxic effects on  
316 immunofluorescence from homogeneous sample illumination during OPT acquisition, the sample  
317 was relabeled using both primary and secondary antibodies (see above) and cleared in BABB

318 without agarose mounting. The brain was then scanned using an UltraMicroscope II (Miltenyi  
319 Biotec, Germany) with a 1× Olympus objective (PLAPO 2XC, Olympus, Japan), coupled to an  
320 Olympus zoom body providing 0.63–6.3× magnification with a lens-corrected dipping cap  
321 MVPLAPO 2× DC DBE objective (Olympus). For image acquisition, left and right light sheets  
322 were merged with a 0.14 numerical aperture, which resulted in a light sheet *z*-thickness of 3.87 μm  
323 and 60% width, while using a 10–15 step blending dynamic focus across the field of view. Image  
324 sections were generated by Inspector Pro software (v7.0124.0, LaVision Biotec GmbH, Germany)  
325 and stitched together using the TeraStitcher script (v9), implemented in Inspector Pro. Stitched  
326 images were then converted into Imaris files (\*.ims files) using the Imaris file converter (v9.5.1,  
327 Bitplane).

328

### 329 *MRI acquisition*

330 After OPT or LSFM imaging, 10 brains were rehydrated in TBST. T1-weighted images were then  
331 acquired at 9.4 Tesla using a preclinical MR system (Bruker BioSpec 94/20, Bruker, Germany)  
332 equipped with a cryogenic RF coil (MRI CryoProbe, Bruker) running Paravision 7.0 software  
333 (Bruker). Specifically, Modified Driven Equilibrium Fourier Transform (MDEFT) sequence with  
334 5 repetitions (TR: 3000 ms; TE: 3 ms; TI: 950 ms; voxel dimension: 40 × 40 × 40mm<sup>3</sup>) was  
335 performed. Postprocessing of images involved the realignment and averaging of individual  
336 repetitions using statistical parametric mapping (SPM8) (the Wellcome Trust Centre for  
337 Neuroimaging, UCL, UK; [www.fil.ion.ucl.ac.uk/spm](http://www.fil.ion.ucl.ac.uk/spm)) implemented in Matlab (R2014a, The  
338 MathWorks Inc., USA).

339

### 340 *MRI template creation*

341 A study-specific MRI template was created using bias-corrected (SPM8) MR images (n = 10),  
342 which were realigned and averaged using serial longitudinal registration in SPM12 implemented  
343 in Matlab (R2015b, The MathWorks Inc.). Then, all individual MR scans were coregistered with  
344 the template image. Study- and sequence-specific segments and TPMs were created using a 2-step  
345 segmentation and DARTEL pipeline initially based on in-house generated tissue priors. Briefly, a  
346 primary segmentation and DARTEL algorithm was applied to individual T1-weighted images to  
347 generate preliminary tissue priors for the study, using the toolbox SPMmouse. The entire process  
348 was then repeated (segmentation + DARTEL) using the tissue priors generated at the first step to  
349 produce study- and sequence-specific TPMs.

350

### 351 *Creation of OPT-MRI fusion images*

352 OPT images with viral signal and autofluorescence signal were reconstructed in DICOM format  
353 using NRecon software (v.1.7.0.4, Bruker) followed by their conversion into NifTi using PMOD  
354 VIEW tool (v.4.2, PMOD Technologies Inc., Switzerland) or the dcm2nii tool in MRIcron  
355 software for OPT and MR images, respectively. Coregistration of OPT with the study-specific  
356 MRI template was performed using the toolbox SPMmouse in SPM8. Voxel-to-voxel affine  
357 transformation matrices were calculated using individual tissue autofluorescence from OPT  
358 images and applied to the corresponding viral OPT images. Fusion images of viral OPT signal  
359 were created for each individual brain using its own MRI and with the study-specific MRI template  
360 using the PMOD VIEW tool or Amira-Avizo software (v6.3.0, Thermo Fisher Scientific) for 3D  
361 renderings. Finally, brain areas with viral signal were identified according to the Turone Mouse  
362 Brain Template and Atlas (TMBTA) <sup>21</sup>.

363



364 ***IHC for brain slice***

365 PFA-fixed brain was washed in PBS, dehydrated overnight in a 30% w/v sucrose solution, snap-  
366 frozen on dry ice in Optimal Cutting Temperature medium (#361603E, VWR, USA), and stored  
367 at -80 °C until cryosectioning. The organ was sectioned along the sagittal plane at 10 µm thickness  
368 using a rotatory microtome cryostat (Microm Microtome Cryostat HM 500M, Microm, USA).  
369 Brain sections were permeabilized and blocked in 10% v/v NGS, 0.2% v/v TritonX-100, an 1%  
370 w/v bovine serum albumin in PBS for 1 h at room temperature (RT), immunolabelled with primary  
371 antibodies overnight at 4 °C, and then labeled with fluorescent secondary antibody for 1 h at RT  
372 in the dark. For immunodetection, the primary and secondary antibodies (Supplementary Table 1)  
373 were diluted in 2% v/v NGS and 0.5% v/v TritonX-100 in PBS. Confocal fluorescence microscopy  
374 was performed using a Zeiss 710 confocal microscope (Zeiss, Germany) controlled by Zeiss Zen  
375 interface (v.14.0.19.201) with Axio Observer inverted microscope equipped with Plan  
376 Apochromat 20×/0.8, C-Apochromat 40×/1.2, and Plan Apochromat 63×/1.4 objective lens.  
377 Large-area imaging was performed using a Nikon Eclipse Ti-E inverted microscope (Nikon,  
378 Japan) with an DU897 ANDOR EMCCD camera controlled by Nikon NIS Elements interface,  
379 equipped with Nikon CFI Plan Apochromat 10× (N.A. 0.45) DIC objective. To portray the large  
380 area, composite images were created by stitching together individual images using NIS-Elements  
381 AR software (v5.21.03, Nikon).

382

383 ***Fixation, resin embedding, and staining of tissue for electron microscopy***

384 ChP from the brain of LGTV-infected *Ifnar*<sup>-/-</sup> mice were prepared for electron microscopy by  
385 cardiac perfusion with 20 mL of 0.1 M phosphate buffer, followed by 20 mL of 2.5% w/v  
386 glutaraldehyde and 4% w/v PFA in 0.1 M phosphate fixative solution. Fourth ventricle ChP was

387 dissected and further immersed in the same fixative solution for an additional 24 h. The tissue was  
388 stained and subsequently embedded in resin using the rOTO (reduced osmium tetroxide,  
389 thiocarbohydrazide, osmium tetroxide) method<sup>30</sup>. The tissue samples were placed in a solution of  
390 1.5% w/v potassium ferrocyanide and 2% w/v osmium tetroxide (OsO<sub>4</sub>), and then incubated in  
391 Pelco Biowave Pro+ (Pelco, Fresno, USA), a microwave tissue processor (“the processor”), under  
392 vacuum for 14 min. After two rinses with MilliQ water on the bench, the samples were washed  
393 twice with MilliQ water in the processor without vacuum pressurization. Then, the samples were  
394 incubated in 1% w/v thiocarbohydrazide solution for 20 min. After another MilliQ water rinse on  
395 the bench, the samples were again washed twice in the processor (no vacuum). Next, the samples  
396 were placed in 2% w/v OsO<sub>4</sub> solution and run in the processor under vacuum for 14 min, followed  
397 by an additional water and processor wash. The samples were placed in 1% w/v uranyl acetate  
398 solution and run in the processor under vacuum for 12 min, followed by another water and  
399 processor wash. The samples were then dehydrated in an ethanol gradient series, by removing and  
400 adding ethanol solutions of increasing concentrations (each step was performed in processor,  
401 without vacuum pressurization): 30%, 50%, 70%, 80%, 90%, 95%, and 100% (twice). The  
402 dehydrated samples were infiltrated with an increasing concentration of Durcupan ACM resin  
403 (Sigma-Aldrich) using the following stepwise ratios of ethanol to Durcupan resin: 1:3, 1:1, and  
404 3:1. All steps were performed in the processor for 3 min under vacuum. The two final infiltration  
405 steps were performed in 100% resin. Finally, the samples were transferred to tissue molds, and  
406 placed at 60 °C for 48 h for complete polymerization of the resin.

407

408 ***TEM***

409 Using a Reichert UltraCut S ultramicrotome (Leica, Germany), resin-embedded samples were  
410 trimmed, and 50 nm sections were cut using a diamond knife and placed onto copper slot grids.  
411 Resin-embedded sections were imaged using a 120 kV Talos L120C transmission electron  
412 microscope (Thermo Fischer Scientific) fitted with a LaB6 filament and Ceta 4k × 4k CMOS  
413 camera sensor. Images were acquired at 2600×, 8500×, and 36,000× magnification corresponding  
414 to a pixel size of 54.3, 17.0, and 4.1 Å/px, respectively, at the specimen level. TEM images were  
415 analyzed by ImageJ software (NIH).

416

#### 417 *Volume imaging using FIB-SEM*

418 Resin-embedded tissue blocks were trimmed, mounted on SEM stubs, and then coated with a 5  
419 nm platinum layer using a Q150T-ES sputter coater (Quorum Technologies, UK) before FIB-SEM  
420 volume imaging. Data was acquired using Scios Dual beam microscope (FIB-SEM) (Thermo  
421 Fischer Scientific). Electron beam imaging was acquired at 2 kV, 0.1 nA current, 1.9 × 1.9 nm  
422 pixel spacing, 7 mm working distance, 10 μs acquisition time, and 3072 × 2048 resolution using a  
423 T1 detector. SEM images were acquired every 20 nm. The working voltage of gallium ion beam  
424 was set at 30 kV, and 0.5 nA current was used for FIB milling. The specimens were imaged at 5 ×  
425 5 μm block face and 5 μm depth. FIB milling and SEM imaging were automated using the Auto  
426 Slice and View software (Thermo Fischer Scientific). SEM volume images were aligned and  
427 reconstructed using ImageJ (NIH) with linear stack alignment, with SIFT and  
428 MultiStackRegistration plugins<sup>31,32</sup>. Analysis and segmentation of SEM volume images was done  
429 using Amira-Avizo software (v2020.3.1, Thermo Fisher Scientific).

430

431 **Data availability:**

432 All data are available in the main text or the supplementary materials. MR template will be  
433 deposited at NeuroImaging Tools and Resources Collaboratory (NITRC) and publicly available  
434 upon publication of the manuscript.

435

436 **References:**

- 437 1 Sips, G. J., Wilschut, J. & Smit, J. M. Neuroinvasive flavivirus infections. *Rev Med Virol*  
438 22, 69-87, doi:10.1002/rmv.712 (2012).
- 439 2 Gosztonyi, G. & Koprowski, H. The concept of neurotropism and selective vulnerability  
440 ("pathocclisis") in virus infections of the nervous system--a historical overview. *Curr Top*  
441 *Microbiol Immunol* 253, 1-13, doi:10.1007/978-3-662-10356-2\_1 (2001).
- 442 3 Sejvar, J. J. The long-term outcomes of human West Nile virus infection. *Clin Infect Dis*  
443 44, 1617-1624, doi:10.1086/518281 (2007).
- 444 4 Turtle, L., Griffiths, M. J. & Solomon, T. Encephalitis caused by flaviviruses. *QJM* 105,  
445 219-223, doi:10.1093/qjmed/hcs013 (2012).
- 446 5 Gould, E. A. & Solomon, T. Pathogenic flaviviruses. *Lancet* 371, 500-509,  
447 doi:10.1016/S0140-6736(08)60238-X (2008).
- 448 6 Ruzek, D. *et al.* Tick-borne encephalitis in Europe and Russia: Review of pathogenesis,  
449 clinical features, therapy, and vaccines. *Antiviral Res* 164, 23-51,  
450 doi:10.1016/j.antiviral.2019.01.014 (2019).
- 451 7 Kubinski, M. *et al.* Tick-Borne Encephalitis Virus: A Quest for Better Vaccines against a  
452 Virus on the Rise. *Vaccines (Basel)* 8, doi:10.3390/vaccines8030451 (2020).

- 453 8 Alanentalo, T. *et al.* Quantification and three-dimensional imaging of the insulinitis-  
454 induced destruction of beta-cells in murine type 1 diabetes. *Diabetes* 59, 1756-1764,  
455 doi:10.2337/db09-1400 (2010).
- 456 9 Sharpe, J. *et al.* Optical projection tomography as a tool for 3D microscopy and gene  
457 expression studies. *Science* 296, 541-545, doi:10.1126/science.1068206 (2002).
- 458 10 Dodt, H. U. *et al.* Ultramicroscopy: three-dimensional visualization of neuronal networks  
459 in the whole mouse brain. *Nat Methods* 4, 331-336, doi:10.1038/nmeth1036 (2007).
- 460 11 Bocan, T. M., Panchal, R. G. & Bavari, S. Applications of in vivo imaging in the  
461 evaluation of the pathophysiology of viral and bacterial infections and in development of  
462 countermeasures to BSL3/4 pathogens. *Mol Imaging Biol* 17, 4-17, doi:10.1007/s11307-  
463 014-0759-7 (2015).
- 464 12 Muller, U. *et al.* Functional role of type I and type II interferons in antiviral defense.  
465 *Science* 264, 1918-1921, doi:10.1126/science.8009221 (1994).
- 466 13 Weber, E. *et al.* Type I interferon protects mice from fatal neurotropic infection with  
467 Langkat virus by systemic and local antiviral responses. *J Virol* 88, 12202-12212,  
468 doi:10.1128/JVI.01215-14 (2014).
- 469 14 Kurhade, C. *et al.* Type I Interferon response in olfactory bulb, the site of tick-borne  
470 flavivirus accumulation, is primarily regulated by IPS-1. *J Neuroinflammation* 13, 22,  
471 doi:10.1186/s12974-016-0487-9 (2016).
- 472 15 Maffioli, C., Grandgirard, D., Engler, O. & Leib, S. L. A tick-borne encephalitis model in  
473 infant rats infected with langkat virus. *J Neuropathol Exp Neurol* 73, 1107-1115,  
474 doi:10.1097/NEN.0000000000000131 (2014).

- 475 16 Wang, Q. *et al.* The Allen Mouse Brain Common Coordinate Framework: A 3D  
476 Reference Atlas. *Cell* 181, 936-953 e920, doi:10.1016/j.cell.2020.04.007 (2020).
- 477 17 Sawiak, S. J., Wood, N. I., Williams, G. B., Morton, A. J. & Carpenter, T. A. Voxel-  
478 based morphometry with templates and validation in a mouse model of Huntington's  
479 disease. *Magn Reson Imaging* 31, 1522-1531, doi:10.1016/j.mri.2013.06.001 (2013).
- 480 18 Sunkin, S. M. *et al.* Allen Brain Atlas: an integrated spatio-temporal portal for exploring  
481 the central nervous system. *Nucleic Acids Res* 41, D996-D1008, doi:10.1093/nar/gks1042  
482 (2013).
- 483 19 Hikishima, K. *et al.* In vivo microscopic voxel-based morphometry with a brain template  
484 to characterize strain-specific structures in the mouse brain. *Sci Rep* 7, 85,  
485 doi:10.1038/s41598-017-00148-1 (2017).
- 486 20 Dorr, A. E., Lerch, J. P., Spring, S., Kabani, N. & Henkelman, R. M. High resolution  
487 three-dimensional brain atlas using an average magnetic resonance image of 40 adult  
488 C57Bl/6J mice. *Neuroimage* 42, 60-69, doi:10.1016/j.neuroimage.2008.03.037 (2008).
- 489 21 Barriere, D. A. *et al.* Brain orchestration of pregnancy and maternal behavior in mice: A  
490 longitudinal morphometric study. *Neuroimage* 230, 117776,  
491 doi:10.1016/j.neuroimage.2021.117776 (2021).
- 492 22 Renier, N. *et al.* iDISCO: a simple, rapid method to immunolabel large tissue samples for  
493 volume imaging. *Cell* 159, 896-910, doi:10.1016/j.cell.2014.10.010 (2014).
- 494 23 Stadtbaumer, K., Leschnik, M. W. & Nell, B. Tick-borne encephalitis virus as a possible  
495 cause of optic neuritis in a dog. *Vet Ophthalmol* 7, 271-277, doi:10.1111/j.1463-  
496 5224.2004.04030.x (2004).

- 497 24 Fu, T. L., Ong, K. C., Tan, S. H. & Wong, K. T. Japanese Encephalitis Virus Infects the  
498 Thalamus Early Followed by Sensory-Associated Cortex and Other Parts of the Central  
499 and Peripheral Nervous Systems. *J Neuropathol Exp Neurol* 78, 1160-1170,  
500 doi:10.1093/jnen/nlz103 (2019).
- 501 25 Grabowski, J. M. *et al.* Flavivirus Infection of Ixodes scapularis (Black-Legged Tick) Ex  
502 Vivo Organotypic Cultures and Applications for Disease Control. *mBio* 8,  
503 doi:10.1128/mBio.01255-17 (2017).
- 504 26 Overby, A. K., Popov, V. L., Niedrig, M. & Weber, F. Tick-borne encephalitis virus  
505 delays interferon induction and hides its double-stranded RNA in intracellular membrane  
506 vesicles. *J Virol* 84, 8470-8483, doi:10.1128/JVI.00176-10 (2010).
- 507 27 Alanentalo, T. *et al.* Tomographic molecular imaging and 3D quantification within adult  
508 mouse organs. *Nat Methods* 4, 31-33, doi:10.1038/nmeth985 (2007).
- 509 28 Eriksson, A. U. *et al.* Near infrared optical projection tomography for assessments of  
510 beta-cell mass distribution in diabetes research. *J Vis Exp*, e50238, doi:10.3791/50238  
511 (2013).
- 512 29 Hornblad, A., Cheddad, A. & Ahlgren, U. An improved protocol for optical projection  
513 tomography imaging reveals lobular heterogeneities in pancreatic islet and beta-cell mass  
514 distribution. *Islets* 3, 204-208, doi:10.4161/isl.3.4.16417 (2011).
- 515 30 Deerinck, T. J., Bushong, E. A., Thor, A. & Ellisman, M. H. *NCMIR methods for 3D*  
516 *EM: A new protocol for preparation of biological specimens for serial block face*  
517 *scanning electron microscopy* <<https://www.ncmir.ucsd.edu/sbem-protocol>> (2010).
- 518 31 Saalfeld, S. *Linear stack alignment with SIFT*. [https://imagej.net/imagej-wiki-](https://imagej.net/imagej-wiki-static/Linear_Stack_Alignment_with_SIFT)  
519 *static/Linear\_Stack\_Alignment\_with\_SIFT*, (2008).

520 32 Busse, B. & Miura, K. *MultiStackReg*. <https://biii.eu/multistackreg>, 2016).

521

## 522 **Acknowledgments:**

523 We thank G. Dobler (Bundeswehr Institute of Microbiology, Munich, Germany) for providing a  
524 stock of LGTV strain TP21; A. Pletnev (Laboratory of Infectious Diseases, NIAID, NIH,  
525 Bethesda, MD, USA) for providing the GFP-expressing LGTV infectious clone; and N.O. Gekara  
526 (Department of Molecular Biosciences, Stockholm University, Stockholm, Sweden) for providing  
527 the *Ifnar*<sup>-/-</sup> mouse colony. We thank M. Eriksson and C. Nord (UCMM, Umeå University, Umeå,  
528 Sweden) for OPT training, and J. Gilthorpe (Department of Integrative Medical Biology, Umeå  
529 University, Umeå, Sweden) for invaluable discussions. We also acknowledge Umeå Center for  
530 Microbial Research (UCMR); the Biochemical Imaging Center at Umeå University (BICU), and  
531 the National Microscopy Infrastructure (NMI; VR-RFI 2019-00217) for microscopy support; the  
532 Umeå Centre for Electron Microscopy (UCEM), a SciLifeLab National Cryo-EM facility and part  
533 of NMI (VR-RFI 2016-00968) grants from the Knut and Alice Wallenberg Foundation and Kempe  
534 Foundation, for EM support; and the Small Animal Research and Imaging Facility (SARIF) at  
535 Umeå University, for MRI support.

536

## 537 **Funding:**

538 This work is funded by Human Frontier Science Program, Career Development Award  
539 CDA00047/2017-C to LAC; Kempe Foundation, MIMS Excellence by Choice Postdoctoral  
540 Program under the patronage of Emmanuelle Charpentier, grant SMK-1532 to ES and JZ;  
541 Knut and Alice Wallenberg Foundation, MIMS Excellence by Choice Postdoctoral Program under  
542 the patronage of Emmanuelle Charpentier, grant KAW2015.0284 to NC; Laboratory for Molecular



543 Infection Medicine Sweden (MIMS) to AKÖ; Swedish Research Council grants 2017-01307 to  
544 UA, 2018-05851 to LAC and AKÖ, and 2020-06224 to AKÖ; Umeå University Medical Faculty  
545 to DM and UA; and Wallenberg Centre for Molecular Medicine Umeå (LAC)

546

547 **Author contributions:**

548 NC, SMAW, ES, JZ, LAC, UA, DM and AKÖ conceptualized the manuscript. NC, SMAW, ES,  
549 MH, FM, JZ, EN and DW developed methodology and carried out the experiments. LAC, UA,  
550 DM and AKÖ provided supervision and critical evaluation with the manuscript. NC, SMAW, ES,  
551 LAC, UA, DM and AKÖ wrote the original draft of the manuscript and all authors reviewed and  
552 edited the manuscript.

553

554 **Competing interests:**

555 Authors declare that they have no competing interests.

556

557 **Materials and Correspondence:**

558 Raw data can be obtained upon request (address AKÖ, [anna.overby@umu.se](mailto:anna.overby@umu.se))

559

560 **Figures:**

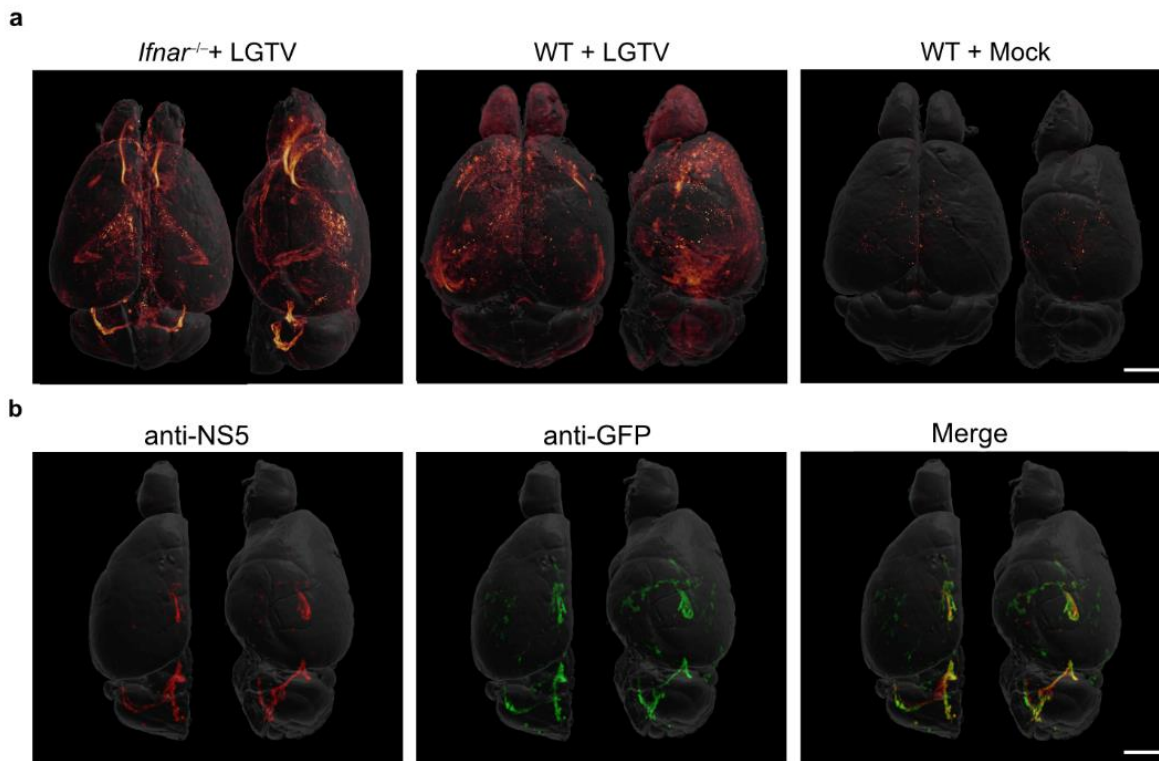

561

562 **Fig. 1.** OPT reveals the distribution of LGTV infection in the adult mouse brain shaped by type I  
563 IFN response. **a** Volumetric 3D-render of the brain of mock and LGTV infected mouse  
564 immunolabeled with anti-NS5 (virus marker; red glow) antibody. The signal intensity was  
565 normalized within an individual brain and adjusted to identical minimum and maximum. Five mice  
566 per group were analyzed and representative images are shown. The brain images for the remaining  
567 animals (n = 4 per group) are shown in Supplementary Fig. 2. For each image pair, the top and  
568 lateral views of the same specimen are shown. **b** Volumetric 3D-render of a half of brain from  
569 *Ifnar*<sup>-/-</sup> mouse infected with LGTV-GFP. The brain was immunolabeled with anti-NS5 (red) and  
570 anti-GFP antibodies (green). Signal overlap is shown in the merge image. Anatomical outlines  
571 were created by iso-surface rendering of autofluorescence signals. All scale bars = 2000  $\mu$ m.

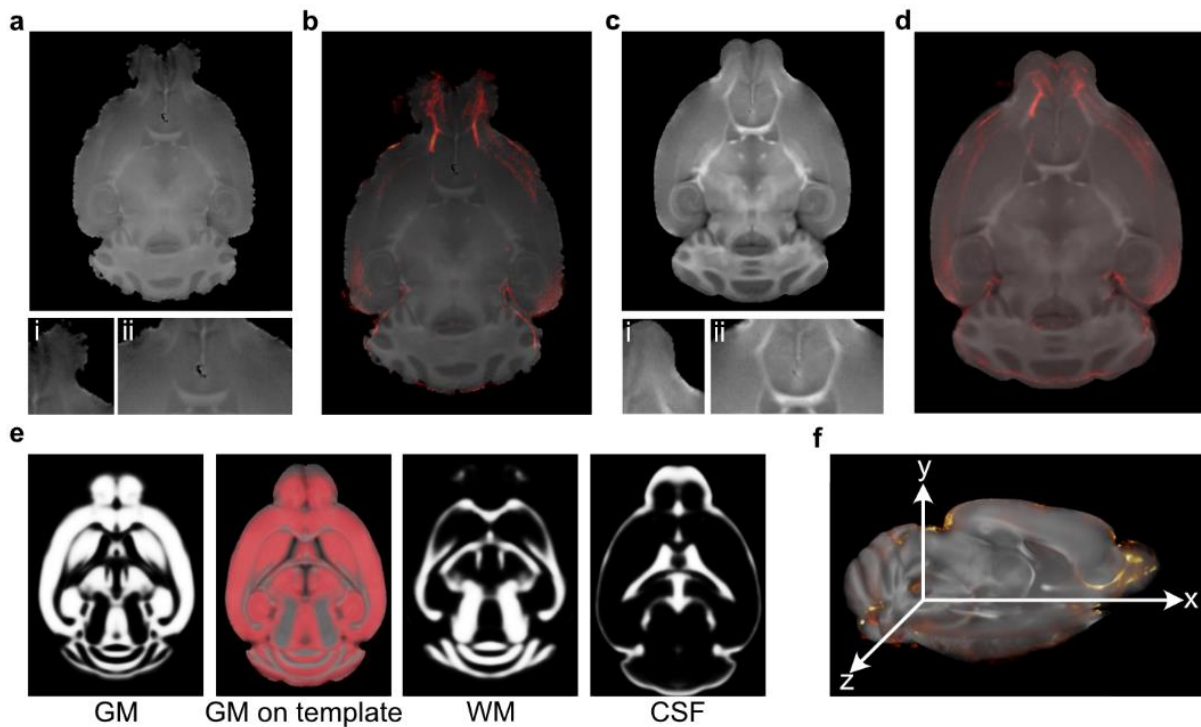

572

573 **Fig. 2.** OPT-MRI coregistration and template creation. **a** Sectional image of a single-subject MRI  
574 with insets showing zoomed image at (i) olfactory bulb and (ii) anterior commissure. **b** Fusion  
575 image created using viral OPT signal (red) with own MR scan. **c** Sectional image of the developed  
576 MRI brain template with insets showing zoomed image at (i) olfactory bulb and (ii) anterior  
577 commissure, showing improved anatomical details compared to own MR (a). **d** Fusion images  
578 created using viral OPT signal (red) with the template. **e** Study-specific tissue probability maps,  
579 perfectly fitting the template. GM, gray matter; WM, white matter; CSF, cerebrospinal fluid. **f**  
580 Detailed anatomical mapping of viral OPT signal with the template in 3D.

581

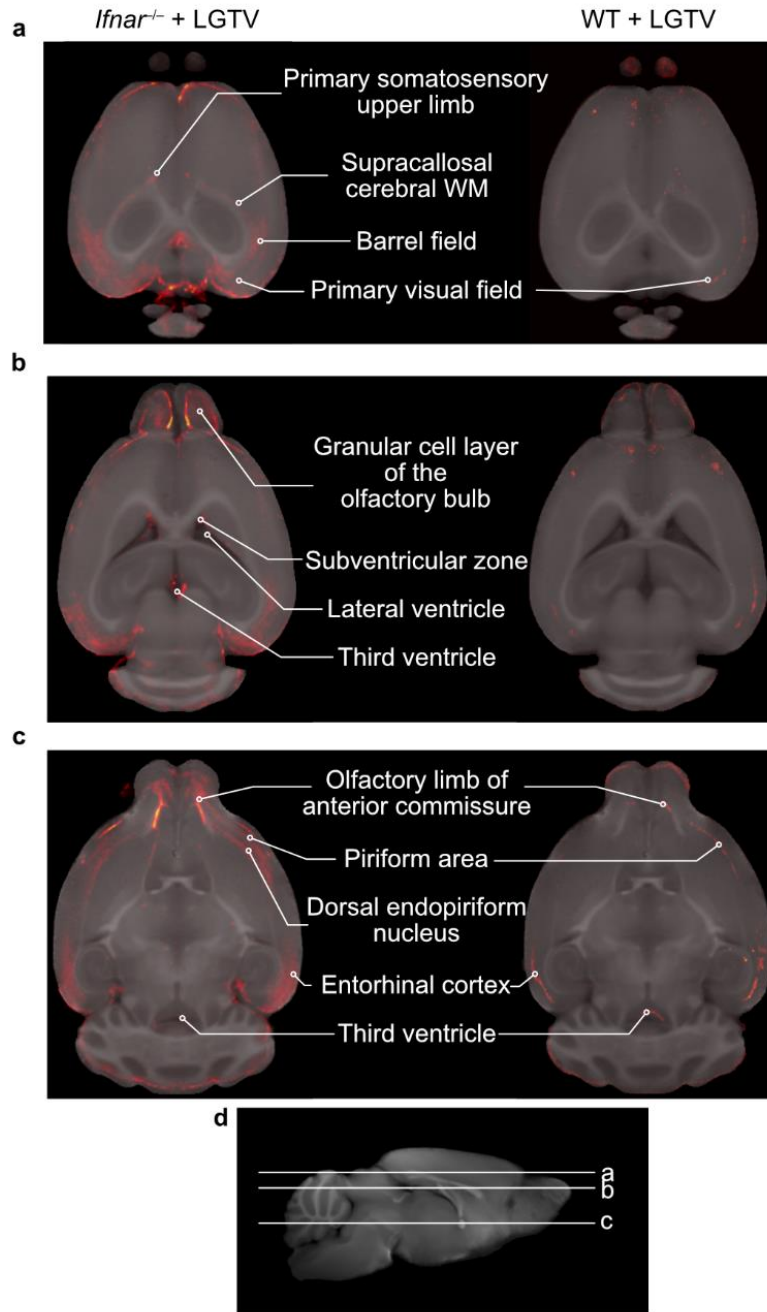

582

583 **Fig. 3.** Brain mapping of viral signal using the developed OPT-MR fusion approach. **a-c**

584 Anatomical mapping of brain regions after coregistration of viral OPT signal (red) with the study-

585 specific MR brain template (gray). **d** Schematic illustration of slices of the brain template shown

586 in A–C, viewed from the sagittal plane.

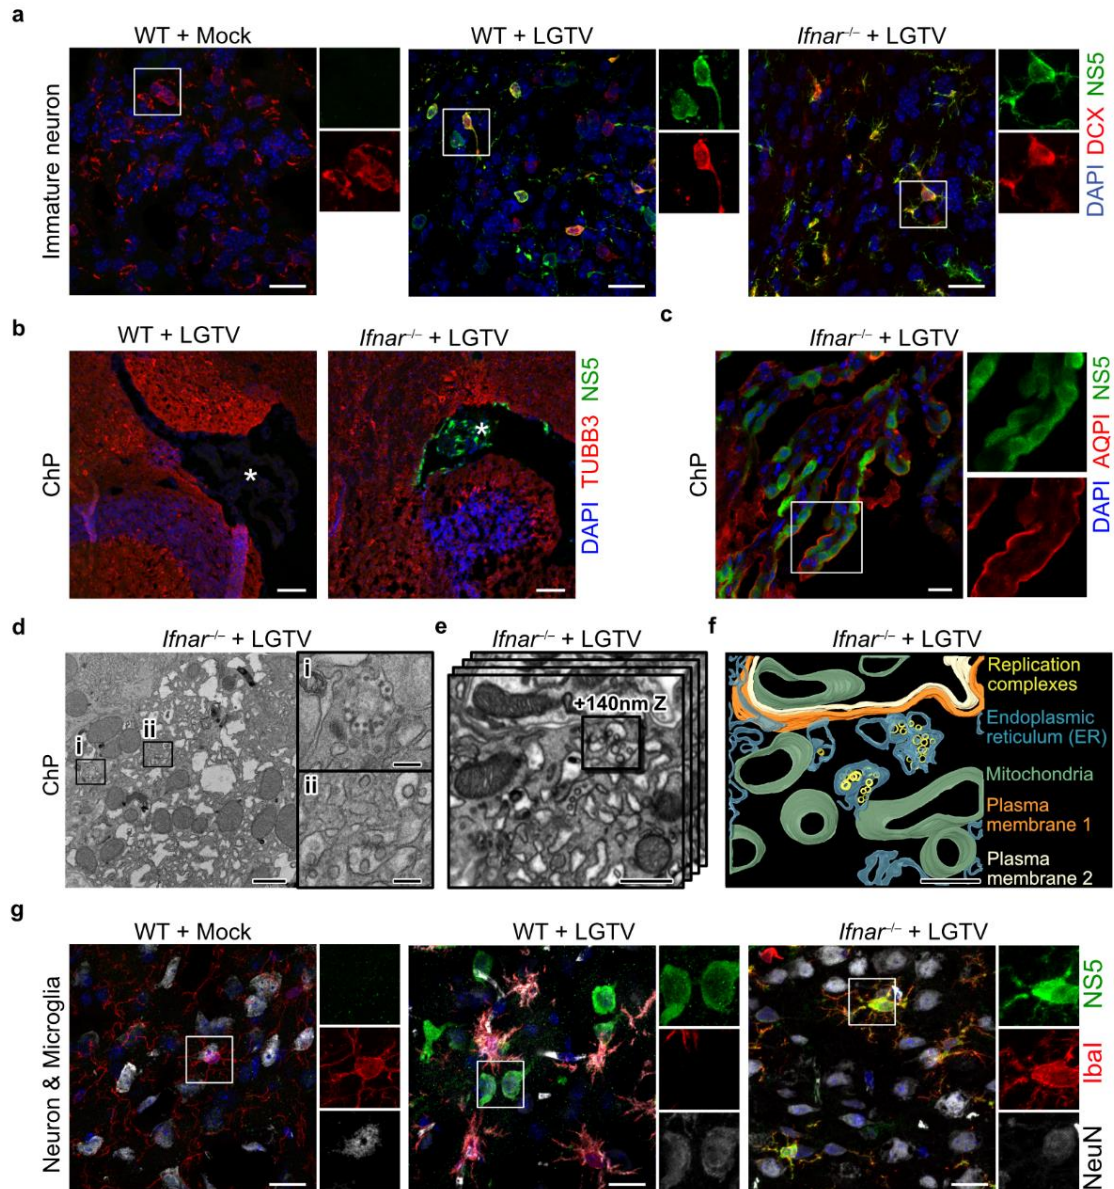

587

588 **Fig. 4.** Validation of LGTV infection in mouse brain using confocal and electron microscopy. **a**

589 Maximum-intensity projection of confocal z-stack captured at olfactory bulb from sagittal brain

590 sections (10 μm). The sections were immunolabeled using antibodies against viral NS5, immature

591 neuron from rostral migratory stream (DCX) and the nucleus (DAPI). Scale bars = 20 μm. **b**

592 Confocal microscopy images of infected cells in the fourth ventricle ChP (indicated by asterisk),

593 immunolabeled with antibodies against NS5 and mature neuron (TUBB3). Scale bars = 100 μm. **c**

594 Fourth ventricle ChP were immunolabeled with antibodies against NS5 and ChP epithelial cell  
595 (AQPI). Scale bars = 20  $\mu\text{m}$ . **d** TEM images of brain sections fixed in resin. The image captured  
596 a heavily infected cell indicated by dilated ER membrane, as compared to ER membrane of  
597 uninfected ChP shown in Supplementary Fig. 3D. Scale bar = 1  $\mu\text{m}$ . Insets show high  
598 magnification images of (i) virus particles and (ii) replication complexes within dilated ER. Scale  
599 bar = 200 nm. **e** FIB-SEM volume imaging shows viral replication complexes within dilated ER.  
600 Scale bar = 500 nm. **f** Segmentation image created from the 3D volume images in (e). Scale bar =  
601 500 nm. **g** Maximum-intensity projection of confocal  $z$ -stack captured at cerebral cortex from  
602 sagittal brain sections (10  $\mu\text{m}$ ). The sections were immunolabeled using antibodies against viral  
603 NS5, mature neuron (NeuN) and microglia (Iba1). The images are representative of at least 3  
604 biological replicates for confocal images and 2 biological replicates with 3-5 technical replicates  
605 for TEM and FIB-SEM. Scale bars = 20  $\mu\text{m}$ .
